# Supplementary material for: The effect of conjugation degree of aromatic carboxylic acids on electronic and photo-responsive behaviors of naphthalenediimide-based coordination polymers
Source: Royal Society of Chemistry journal article supplement (doi:10.1039/d3dt01662e), 2023-01-01
Supplement: d3dt01662e1.pdf [file d3dt01662e1.pdf]

Electronic Supplementary Material (ESI) for Dalton Transactions.

This journal is © The Royal Society of Chemistry 2023

## The effect of conjugation degree of aromatic carboxylic acids on electronic and photo-responsive behaviors of naphthalenediimide-based coordination polymers

Ming Kang, Bohong Gao, Shimin Zhang, Pengfei Hao,\* Gaopeng Li, Junju Shen and Yunlong Fu\*

*Key Laboratory of Magnetic Molecules and Magnetic Information Materials of Ministry of Education & School of Chemistry and Materials Science of Shanxi Normal University, Taiyuan 030031, China*

### Supplementary Information Contents

|                                                                                                                                                                                                             |   |
|-------------------------------------------------------------------------------------------------------------------------------------------------------------------------------------------------------------|---|
| <b>1. Figures</b> .....                                                                                                                                                                                     | 2 |
| <b>Fig. S1</b> Thermo-gravimetric (TG) and Differential scanning calorimetry (DSC) curves of <b>1-3</b> . ..                                                                                                | 2 |
| <b>Fig. S2</b> Kubelka-Munk transformed reflectivity vs energy of complexes <b>1-3</b> . .....                                                                                                              | 2 |
| <b>Fig. S3</b> The switching cycles of coloration-decoloration processes of <b>2</b> (759 nm) upon alternating Xe light illumination and thermal treatment. ....                                            | 3 |
| <b>Fig. S4</b> FT-IR spectra of <b>1-3</b> as-synthesized samples and after irradiation samples. ....                                                                                                       | 3 |
| <b>Fig. S5</b> PXRD patterns of <b>1-3</b> simulated from the X-ray single-crystal structures, as-synthesized samples and after irradiation samples. ....                                                   | 4 |
| <b>Fig. S6</b> The EPR spectra of <b>1</b> , <b>1P-UV</b> and <b>1P-UV-heating</b> (a), <b>2</b> , <b>2P-UV</b> and <b>2P-UV-heating</b> (b) and <b>3</b> , <b>3P-UV</b> and <b>3P-UV-heating</b> (c). .... | 4 |
| <b>Fig. S7</b> Cd 3d (a), C 1s (b), N 1s (c) and O 1s (d) XPS core-level spectra of <b>2</b> and <b>2P</b> . ....                                                                                           | 5 |
| <b>2. Tables</b> .....                                                                                                                                                                                      | 6 |
| <b>Table S1</b> . Crystallographic data and refinement of <b>1-3</b> . ....                                                                                                                                 | 6 |
| <b>Table S2</b> . Selected bond lengths (Å) and angles (°) for <b>1-3</b> . ....                                                                                                                            | 7 |
| <b>Table S3</b> . Hydrogen bonds of for <b>1-3</b> (Å and °) .....                                                                                                                                          | 9 |

## 1. Figures

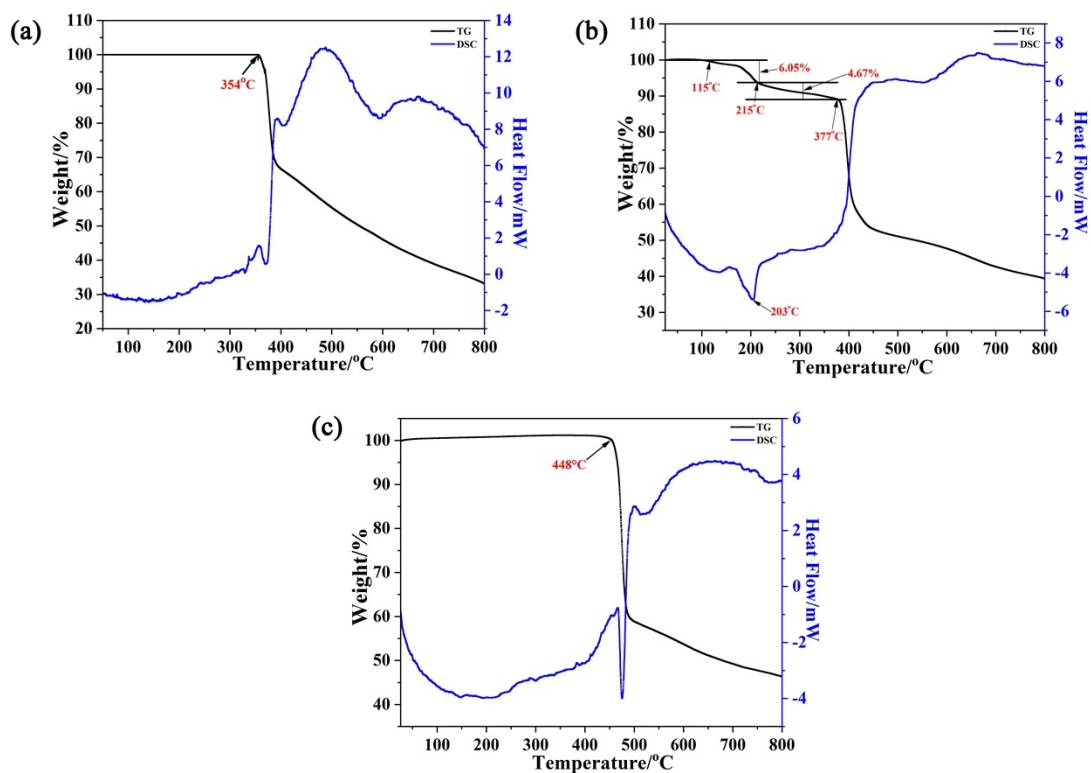

**Fig. S1** Thermo-gravimetric (TG) and Differential scanning calorimetry (DSC) curves of **1-3**.

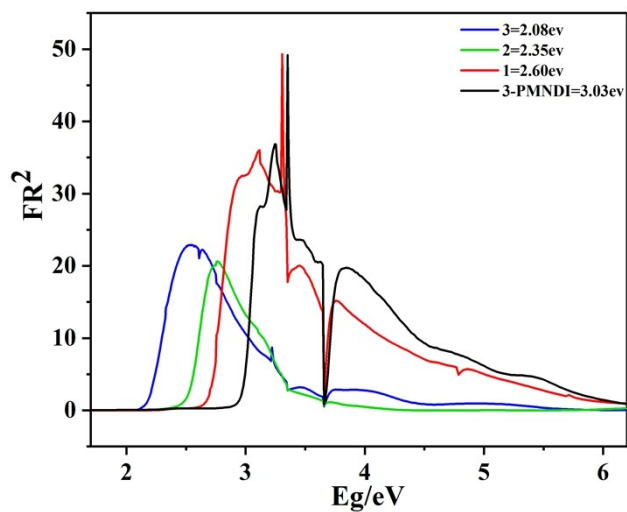

**Fig. S2** Kubelka-Munk transformed reflectivity vs energy of complexes **1-3**.

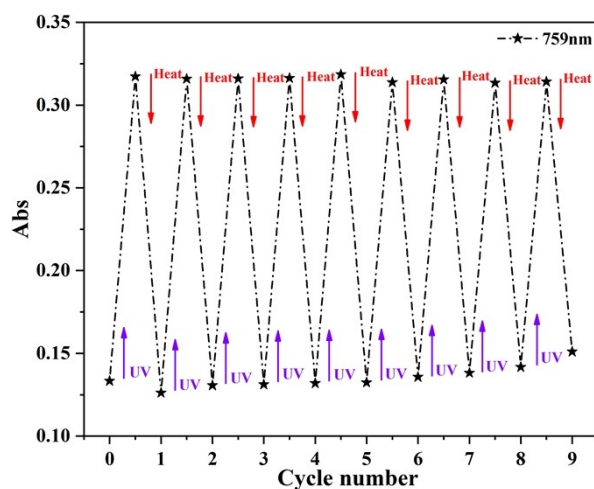

**Fig. S3** The switching cycles of coloration-decoloration processes of **2** (759 nm) upon alternating Xe light illumination and thermal treatment.

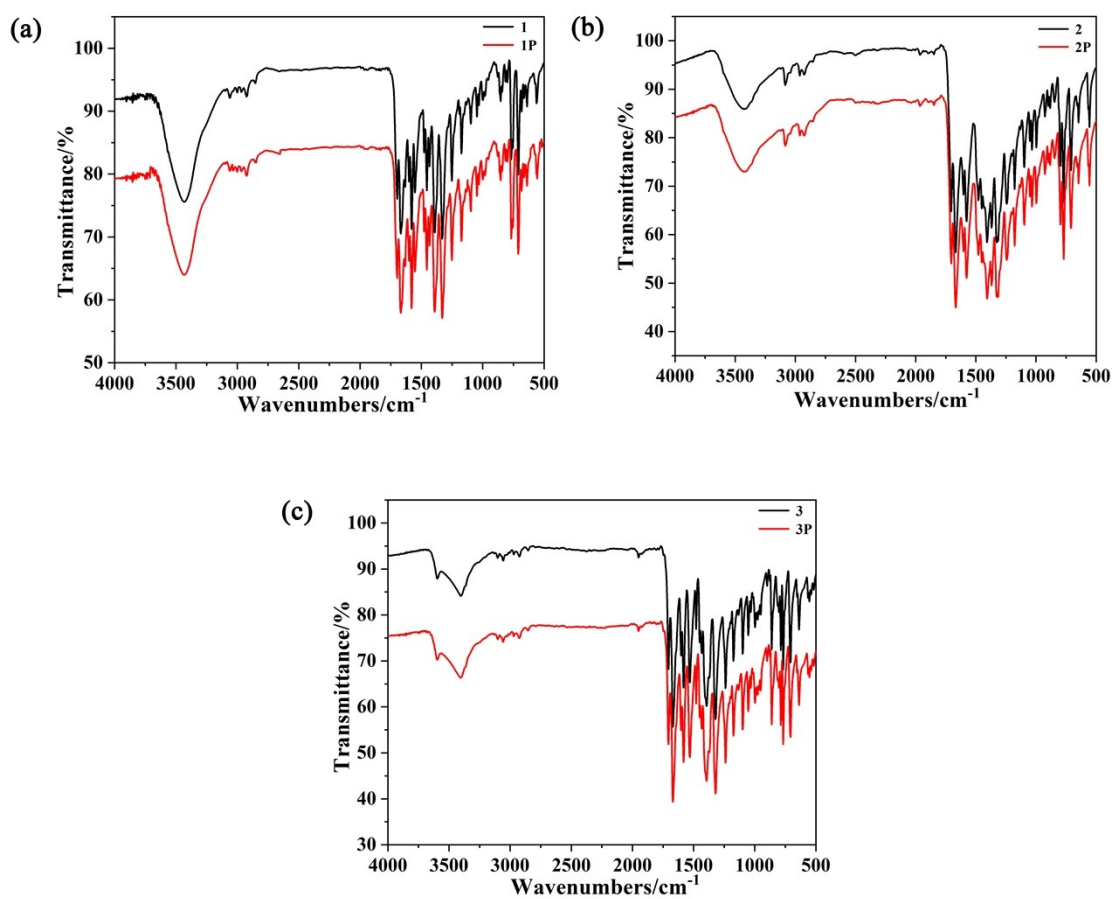

**Fig. S4** FT-IR spectra of **1-3** as-synthesized samples and after irradiation samples.

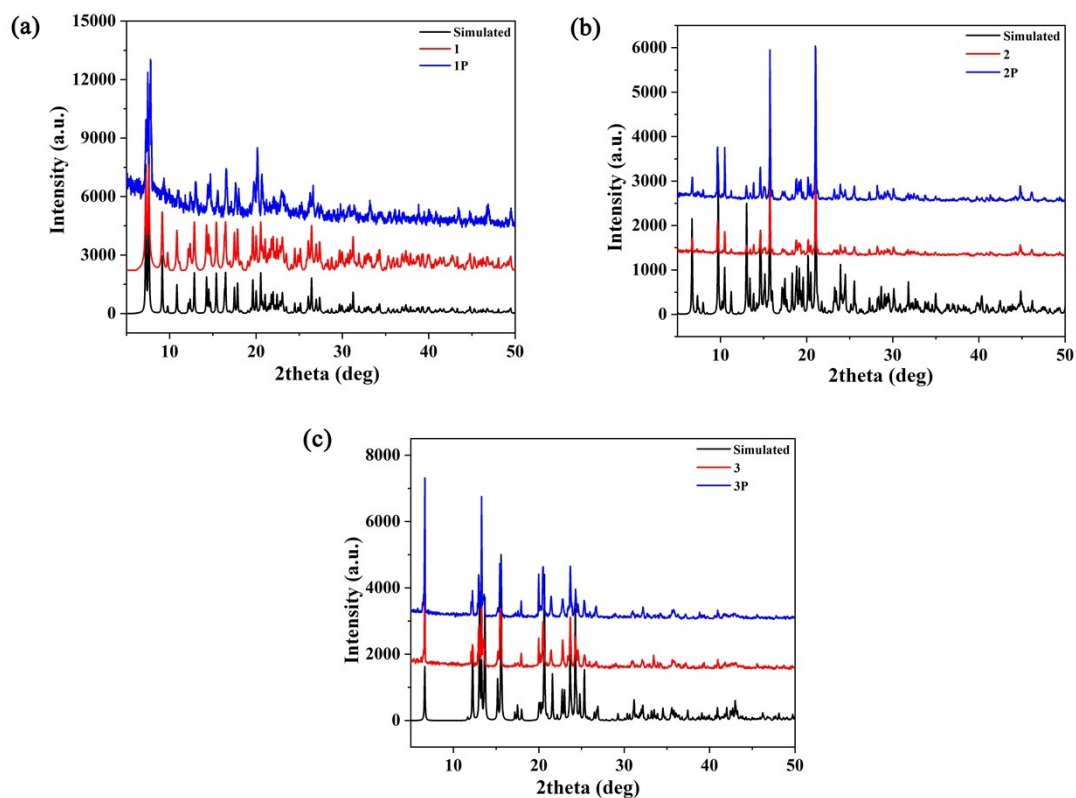

**Fig. S5** PXR D patterns of **1-3** simulated from the X-ray single-crystal structures, as-synthesized samples and after irradiation samples.

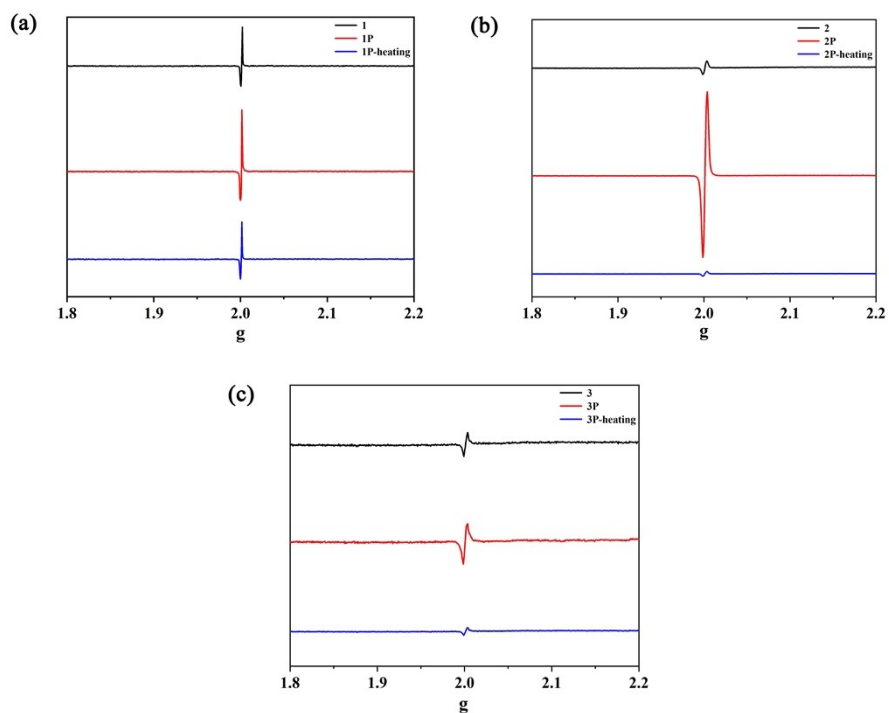

**Fig. S6** The EPR spectra of **1**, **1P-UV** and **1P-UV-heating** (a), **2**, **2P-UV** and **2P-UV-heating** (b) and **3**, **3P-UV** and **3P-UV-heating** (c).

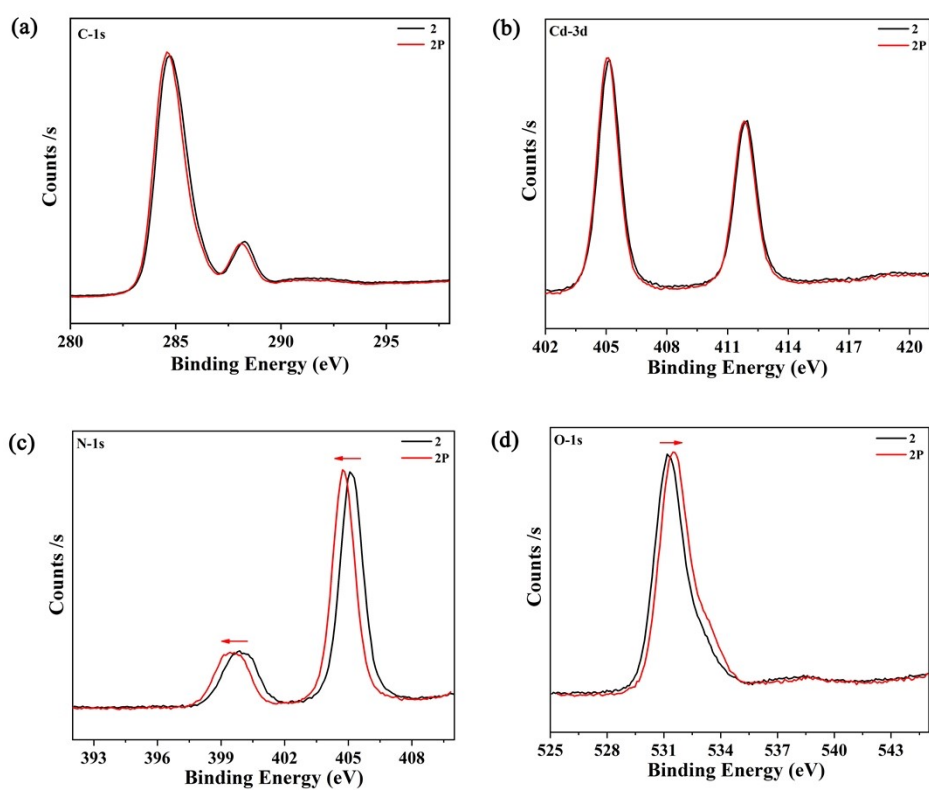

**Fig. S7** Cd 3d (a), C 1s (b), N 1s (c) and O 1s (d) XPS core-level spectra of **2** and **2P**.

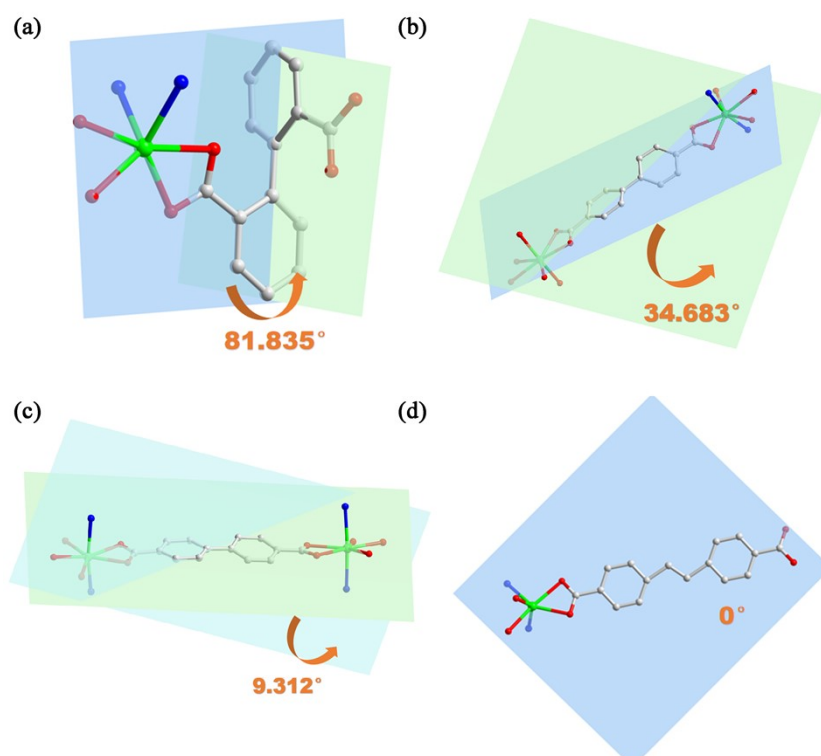

**Fig. S8** The dihedral angle between the two benzene rings of the 2,2'-BPDC<sup>2-</sup> (a), (b), 4,4'-BPDC<sup>2-</sup> (c) and 4,4'-SDC<sup>2-</sup> (d).

## 2. Tables

**Table S1.** Crystallographic data and refinement of **1-3**.

| Compound                                                                                     | <b>1</b>                                                        | <b>2</b>                                                                       | <b>3</b>                                                        |
|----------------------------------------------------------------------------------------------|-----------------------------------------------------------------|--------------------------------------------------------------------------------|-----------------------------------------------------------------|
| CCDC code                                                                                    | 2263419                                                         | 2263420                                                                        | 2263421                                                         |
| Temperature (K)                                                                              | 293(2)                                                          | 293(2)                                                                         | 293(2)                                                          |
| Empirical formula                                                                            | C <sub>40</sub> H <sub>24</sub> CdN <sub>4</sub> O <sub>8</sub> | C <sub>68</sub> H <sub>53</sub> Cd <sub>2</sub> N <sub>9</sub> O <sub>18</sub> | C <sub>42</sub> H <sub>26</sub> CdN <sub>4</sub> O <sub>8</sub> |
| Formula weight                                                                               | 801.03                                                          | 1508.99                                                                        | 827.07                                                          |
| Crystal size (mm)                                                                            | 0.25 × 0.08 × 0.06                                              | 0.341 × 0.259 × 0.058                                                          | 0.24 × 0.16 × 0.06                                              |
| Crystal system                                                                               | monoclinic                                                      | monoclinic                                                                     | monoclinic                                                      |
| Space group                                                                                  | <i>P</i> 2 <sub>1</sub> / <i>c</i>                              | <i>C</i> 2/ <i>c</i>                                                           | <i>C</i> 2/ <i>c</i>                                            |
| <i>a</i> (Å)                                                                                 | 9.8114(4)                                                       | 37.305(2)                                                                      | 15.2689(9)                                                      |
| <i>b</i> (Å)                                                                                 | 14.3212(7)                                                      | 12.4534(8)                                                                     | 8.7100(5)                                                       |
| <i>c</i> (Å)                                                                                 | 23.6696(11)                                                     | 27.1003(17)                                                                    | 26.6400(15)                                                     |
| $\alpha$ (°)                                                                                 | 90                                                              | 90                                                                             | 90                                                              |
| $\beta$ (°)                                                                                  | 99.800(4)                                                       | 103.182(2)                                                                     | 93.109(2)                                                       |
| $\gamma$ (°)                                                                                 | 90                                                              | 90                                                                             | 90                                                              |
| <i>V</i> (Å <sup>3</sup> )                                                                   | 3277.3(3)                                                       | 12258.4(13)                                                                    | 3537.7(4)                                                       |
| <i>Z</i>                                                                                     | 4                                                               | 8                                                                              | 4                                                               |
| <i>D</i> <sub>c</sub> (g cm <sup>-3</sup> )                                                  | 1.623                                                           | 1.635                                                                          | 1.553                                                           |
| $\mu$ (mm <sup>-1</sup> )                                                                    | 0.731                                                           | 0.779                                                                          | 0.680                                                           |
| <i>F</i> (000)                                                                               | 1616.0                                                          | 6112.0                                                                         | 1672.0                                                          |
| Reflections collected                                                                        | 18496                                                           | 111451                                                                         | 21567                                                           |
| Independent reflections                                                                      | 8981                                                            | 15319                                                                          | 4384                                                            |
| <i>R</i> <sub>int</sub>                                                                      | 0.0418                                                          | 0.0390                                                                         | 0.0261                                                          |
| Goodness-of-fit on <i>F</i> <sup>2</sup>                                                     | 1.010                                                           | 1.022                                                                          | 1.107                                                           |
| <i>R</i> <sub>1</sub> / <i>wR</i> <sub>2</sub> , [ <i>I</i> ≥ 2σ( <i>I</i> )] <sup>a,b</sup> | 0.0553/0.0837                                                   | 0.0358/0.0819                                                                  | 0.0308/0.0787                                                   |
| <i>R</i> <sub>1</sub> / <i>wR</i> <sub>2</sub> , (all data)                                  | 0.1121/0.1016                                                   | 0.0588/0.0918                                                                  | 0.0380/0.0816                                                   |

$$^a R_1 = \sum ||F_o| - |F_c|| / \sum |F_o|$$

$$^b wR_2 = [\sum w(F_o^2 - F_c^2)^2 / \sum w(F_o^2)^2]^{1/2}$$

**Table S2.** Selected bond lengths (Å) and angles (°) for **1-3**.

| Compound 1                      |           |            |           |
|---------------------------------|-----------|------------|-----------|
| Cd1-N1                          | 2.395(3)  | Cd1-O2     | 2.302(2)  |
| Cd1-N4#2                        | 2.373(3)  | Cd1-O3#1   | 2.328(2)  |
| Cd1-O1                          | 2.411(3)  | Cd1-O4#1   | 2.401(3)  |
| N1-Cd1-O1                       | 83.55(10) | N42-Cd1-N1 | 81.01(10) |
| N1-Cd1-O4#1                     | 81.26(10) | N42-Cd1-O1 | 85.53(11) |
| #1 -x,+y,-1/2-z; #2 -1+x,1+y,+z |           |            |           |

  

| Compound 2 |            |               |            |
|------------|------------|---------------|------------|
| Cd1-O1     | 2.3467(17) | Cd2-O5        | 2.340(3)   |
| Cd1-O2     | 2.507(2)   | Cd2-O5#3      | 2.340(3)   |
| Cd1-O7     | 2.3306(17) | Cd2-O6        | 2.285(3)   |
| Cd1-O8     | 2.4117(16) | Cd3-O10#1     | 2.3417(16) |
| Cd1-O9     | 2.4152(17) | Cd3-O10       | 2.3416(16) |
| Cd1-N1     | 2.358(2)   | Cd3-O11       | 2.4304(18) |
| Cd1-N4#2   | 2.327(2)   | Cd3-O11#1     | 2.4304(18) |
| Cd2-O3     | 2.384(2)   | Cd3-O12       | 2.271(3)   |
| Cd2-O3#3   | 2.384(2)   | Cd3-N7#1      | 2.393(2)   |
| Cd2-O4#3   | 2.388(2)   | Cd3-N7        | 2.393(2)   |
| Cd2-O4     | 2.388(2)   |               |            |
| O8-Cd1-O9  | 54.16(6)   | O6-Cd2-O5     | 93.12(8)   |
| O8-Cd1-O2  | 136.26(6)  | O5#3-Cd2-O3   | 90.77(9)   |
| O9-Cd1-O2  | 82.12(6)   | O5#3-Cd2-O3#3 | 90.17(9)   |
| O1-Cd1-O8  | 163.80(7)  | O5-Cd2-O3#3   | 90.78(9)   |
| O1-Cd1-O9  | 133.29(6)  | O5-Cd2-O3     | 90.17(9)   |
| O1-Cd1-O2  | 53.54(6)   | O5-Cd2-O4#3   | 85.15(10)  |
| O1-Cd1-N1  | 82.87(7)   | O5-Cd2-O4     | 90.41(10)  |
| O7-Cd1-O8  | 87.50(6)   | O5#3-Cd2-O4   | 85.15(10)  |
| O7-Cd1-O9  | 141.66(6)  | O5#3-Cd2-O4#3 | 90.41(10)  |
| O7-Cd1-O1  | 83.78(7)   | O5-Cd2-O5#3   | 173.77(15) |
| O7-Cd1-O2  | 136.22(6)  | O10-Cd3-O10#1 | 167.72(9)  |

|                                                  |            |                 |            |
|--------------------------------------------------|------------|-----------------|------------|
| O7-Cd1-N1                                        | 87.69(7)   | O10-Cd3-O11     | 54.69(6)   |
| N1-Cd1-O8                                        | 83.15(7)   | O10#1-Cd3-O11   | 137.55(6)  |
| N1-Cd1-O9                                        | 88.01(7)   | O10#1-Cd3-O11#1 | 54.69(6)   |
| N1-Cd1-O2                                        | 95.26(7)   | O10-Cd3-O11#1   | 137.55(6)  |
| N4#2-Cd1-O8                                      | 84.92(7)   | O10-Cd3-N7      | 93.18(7)   |
| N4#2-Cd1-O9                                      | 86.49(7)   | O10#1-Cd3-N7    | 87.69(7)   |
| N4#2-Cd1-O1                                      | 108.65(7)  | O10#1-Cd3-N7#1  | 93.18(7)   |
| N4#2-Cd1-O7                                      | 89.98(7)   | O10-Cd3-N7#1    | 87.69(7)   |
| N4#2-Cd1-O2                                      | 94.62(7)   | O11#1-Cd3-O11   | 83.32(8)   |
| N4#2-Cd1-N1                                      | 167.93(7)  | N7#1-Cd3-O11    | 88.73(7)   |
| O3-Cd2-O3#3                                      | 162.53(11) | N7#1-Cd3-O11#1  | 85.16(7)   |
| O3#3-Cd2-O4                                      | 143.16(7)  | N7-Cd3-O11      | 85.16(7)   |
| O3#3-Cd2-O4#3                                    | 54.27(7)   | N7-Cd3-O11#1    | 88.73(7)   |
| O3-Cd2-O4                                        | 54.27(7)   | N7#1-Cd3-N7     | 171.82(11) |
| O3-Cd2-O4#3                                      | 143.16(7)  | O12-Cd3-O10     | 83.86(4)   |
| O4#3-Cd2-O4                                      | 89.17(10)  | O12-Cd3-O10#1   | 83.86(4)   |
| O6-Cd2-O3#3                                      | 81.26(5)   | O12-Cd3-O11#1   | 138.34(4)  |
| O6-Cd2-O3                                        | 81.26(5)   | O12-Cd3-O11     | 138.34(4)  |
| O6-Cd2-O4                                        | 135.41(5)  | O12-Cd3-O7      | 94.09(6)   |
| O6-Cd2-O4#3                                      | 135.41(5)  | O12-Cd3-O7#1    | 94.09(6)   |
| O6-Cd2-O5#3                                      | 93.12(8)   |                 |            |
| #1 -x,+y,-1/2-z; #2 +x,-y,1/2+z; #3 1-x,+y,3/2-z |            |                 |            |

| Compound 3      |            |             |            |
|-----------------|------------|-------------|------------|
| Cd1 N1#1        | 2.3209(18) | Cd1-O1#1    | 2.2795(17) |
| Cd1-N1          | 2.3210(18) | Cd1-O2#1    | 2.3665(18) |
| Cd1-O1          | 2.2796(17) | Cd1-O2      | 2.3666(18) |
|                 |            |             |            |
| N11-Cd1-N1      | 81.44(10)  | N1-Cd1-O2#1 | 102.90(7)  |
| N11-Cd1-O2#1    | 89.27(7)   | N1-Cd1-O2   | 89.27(7)   |
| #1 1-x,+y,1/2-z |            |             |            |



**Table S3.** Hydrogen bonds of for **1-3** (Å and °)

| Compound 1                                                                                                 |        |          |          |          |
|------------------------------------------------------------------------------------------------------------|--------|----------|----------|----------|
| D-H...A                                                                                                    | d(D-H) | d(H...A) | d(D...A) | <(DHA)   |
| C15-H15...O4#1                                                                                             | 0.93   | 2.36     | 3.026(5) | 128.8    |
| C19-H19...O1                                                                                               | 0.93   | 2.47     | 3.098(4) | 124.7    |
| C20-H20A...O3                                                                                              | 0.97   | 2.32     | 3.259(5) | 162.2    |
| C35-H35A...O2#2                                                                                            | 0.97   | 2.60     | 3.479(4) | 151.4    |
| C35-H35B...O5#3                                                                                            | 0.97   | 2.65     | 3.383(5) | 133.0    |
| C39-H39...O1#4                                                                                             | 0.93   | 2.54     | 3.187(5) | 127.2    |
| #1 1-x,1/2+y,3/2-z; #2 2-x,-1/2+y,3/2-z; #3 2-x,-y,1-z; #4 1+x,-1+y,+z                                     |        |          |          |          |
| Compound 2                                                                                                 |        |          |          |          |
| D-H...A                                                                                                    | d(D-H) | d(H...A) | d(D...A) | <(DHA)   |
| O7-H7A...O9#1                                                                                              | 0.85   | 2.01     | 144.6    | 2.750(2) |
| O7-H7B...O2#1                                                                                              | 0.85   | 2.09     | 143.1    | 2.818(3) |
| O6-H6B...O11#2                                                                                             | 0.86   | 1.95     | 157.9    | 2.765(3) |
| O6-H6A...O11#3                                                                                             | 0.86   | 1.95     | 158.6    | 2.765(3) |
| O5-H5A...O19#4                                                                                             | 0.81   | 1.88     | 175.5    | 2.691(5) |
| O12-H12B...O4#5                                                                                            | 0.85   | 1.93     | 154.0    | 2.716(3) |
| O12-H12A...O4#2                                                                                            | 0.84   | 1.96     | 148.2    | 2.716(3) |
| #1 1/2-x,1/2+y,1/2-z; #2 1/2-x,1/2+y,1/2-z; #3 1/2+x,-1/2+y,1+z; #4 1/2-x,1/2-y,1-z; #5 1/2+x,-1/2+y, -1+z |        |          |          |          |
| Compound 3                                                                                                 |        |          |          |          |
| D-H...A                                                                                                    | d(D-H) | d(H...A) | d(D...A) | <(DHA)   |
| C1-H1...O3#1                                                                                               | 0.93   | 2.51     | 3.176(3) | 128.3    |
| #1 1/2-x,1/2+y,1/2-z                                                                                       |        |          |          |          |
